# Supplementary material for: Heterologous Expression of Nitrate Assimilation Related-Protein DsNAR2.1/NRT3.1 Affects Uptake of Nitrate and Ammonium in Nitrogen-Starved Arabidopsis
Source: PubMed Central journal article supplement (PMC7312895; doi:10.3390/ijms21114027), 2020-06-04

**Table S1.** List of PCR primers <sup>a</sup>.

| <b>Primer Name</b> | <b>Sequence (5'-3')</b>     |
|--------------------|-----------------------------|
| DsNRT3.1-F         | ATGGCGGTGCGAGGATTAAC        |
| DsNRT3.1-R         | CCAAATTAAGTAGCTAGCTTCGAC    |
| 121DsNRT3.1(X)-F   | TCTAGAATGGCGGTGCGAGGATTAAC  |
| 121DsNRT3.1(S)-R   | GAGCTCGTAGCTAGCTTCGACTTCTTC |
| 121DsNRT3.1(K)-R   | GGTACCGTAGCTAGCTTCGACTTCTTC |
| AtActin1-F         | GAAAATGGCTGATGGTGAAG        |
| AtActin1-R         | CTCATAGATAGGAACAGTGTGGC     |
| DsNRT3.1-qF        | ACTCCAAAGTCGCCCTCAA         |
| DsNRT3.1-qR        | AGCGGCGTATGGTTTAGTCG        |
| DsActin7-qF        | CGGTGGCTCTATCCTCGCTT        |
| DsActin7-qR        | TTCCTGTGGACGATTGACGG        |
| AtActin2-qF        | GGTAACATTGTGCTCAGTGGTGG     |
| AtActin2-qR        | AACGACCTTAATCTTCATGCTGC     |
| AtNRT2.1-qF        | CGGTGGACACAGAGCATAAGG       |
| AtNRT2.1-qR        | GGATGATAGGGACAAGTGGTGC      |
| AtNRT2.2-qF        | GCCGACCAACACAAAGAAAA        |
| AtNRT2.2-qR        | CAACTCCAGCGTTTCCAATG        |
| AtNRT2.3-qF        | GCATTCTCGTCCTCAGTCTCG       |
| AtNRT2.3-qR        | TCTTCACAGCAAACCAGAAAACC     |
| AtNRT2.4-qF        | GGACACCGAACACAAAGCCA        |
| AtNRT2.4-qR        | CAAGAGGAGCAGCAGCGAAA        |
| AtNRT2.5-qF        | CTCTCTCTGCTTTCGCCGTT        |
| AtNRT2.5-qR        | TTCCCCACATCATCTTTCTCC       |
| AtNRT2.6-qF        | CGACCTGACCAAAACCGACA        |
| AtNRT2.6-qR        | TGTAAGCATAAGTGAGAAGGCGG     |
| AtNRT2.7-qF        | ATCTCAACGCAACACCAAACC       |
| AtNRT2.7-qR        | TGAAAGGCTCGTGAGTGTGG        |
| AtNRT3.1-qF        | CGACGATGCCAAGAAAACCA        |
| AtNRT3.1-qR        | CCACGACGGAGAAGACACTGAA      |

<sup>a</sup> The specificity and efficiency of the primers were confirmed by the amplification curve, melt curve and melt peak figures, which are shown below.

*DsNRT3.1*

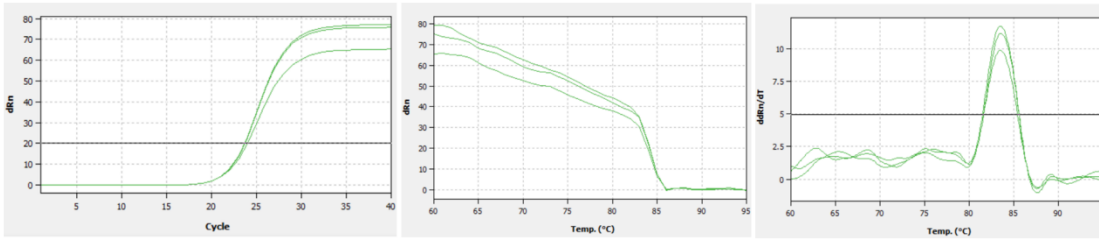

*DsActin7*

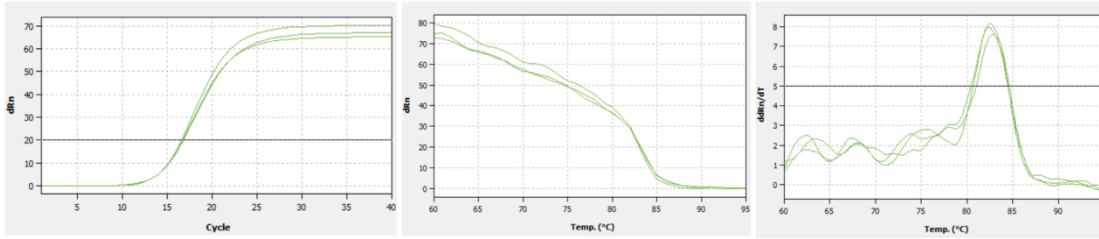

*AtNRT3.1*

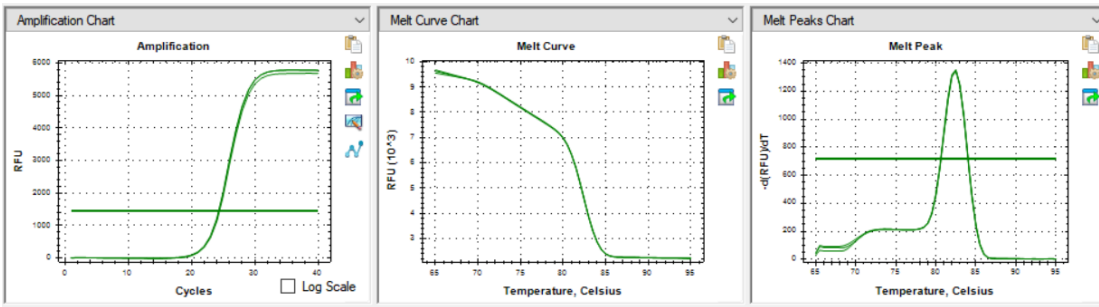

*AtNRT2.1*

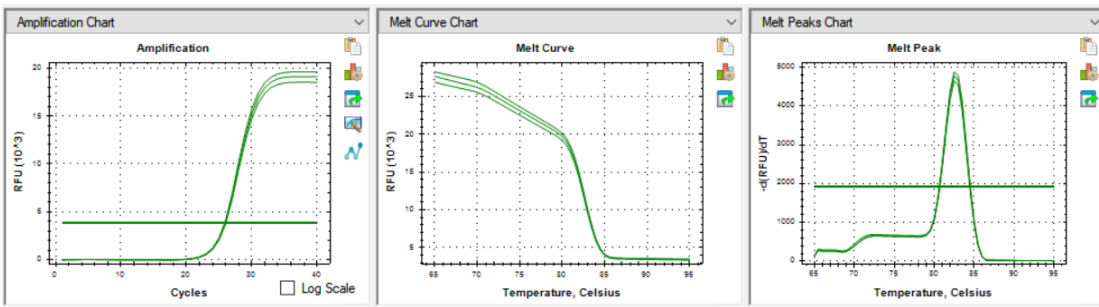

*AtNRT2.2*

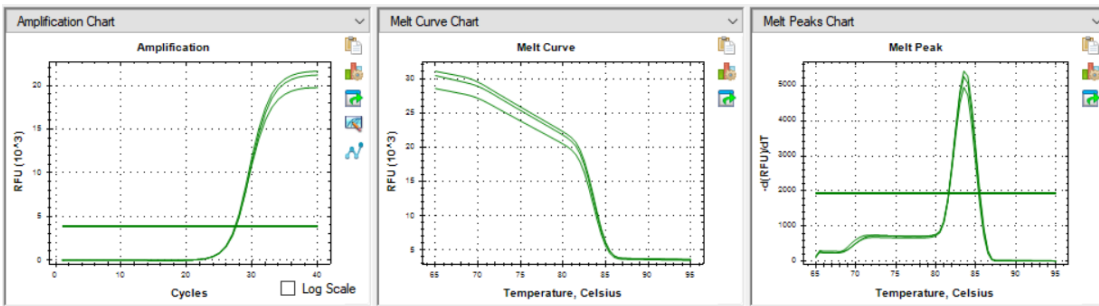

*AtNRT2.3*

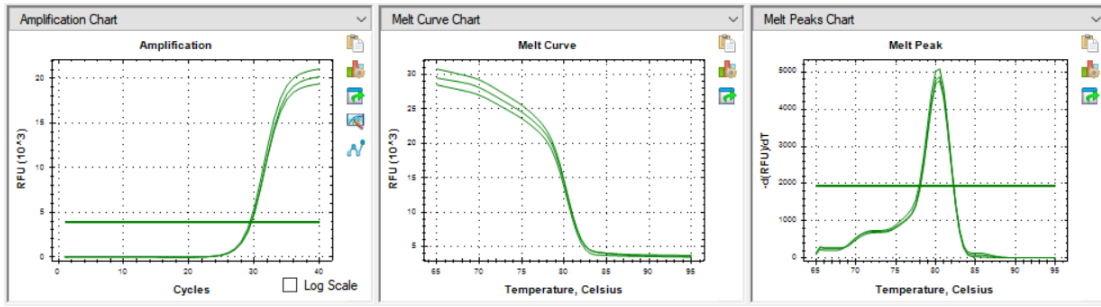

*AtNRT2.4*

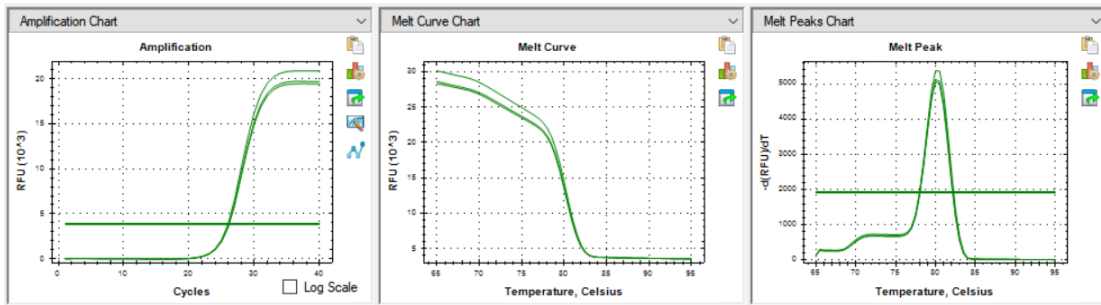

*AtNRT2.5*

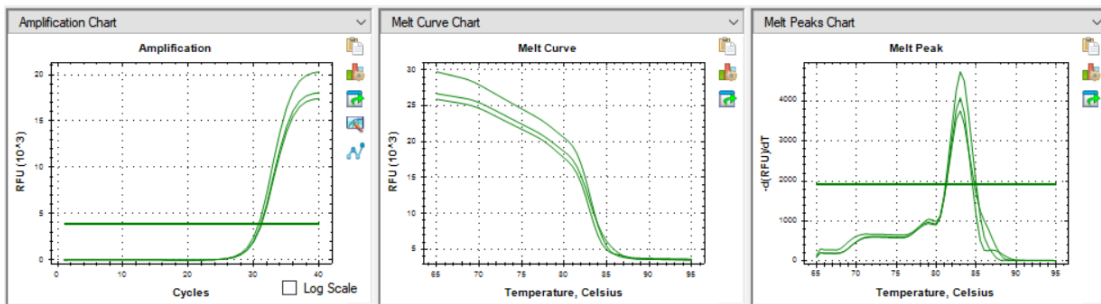

*AtNRT2.6*

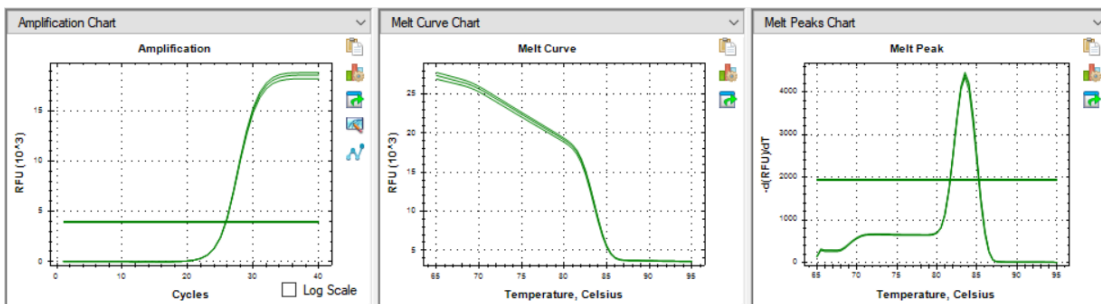

*AtNRT2.7*

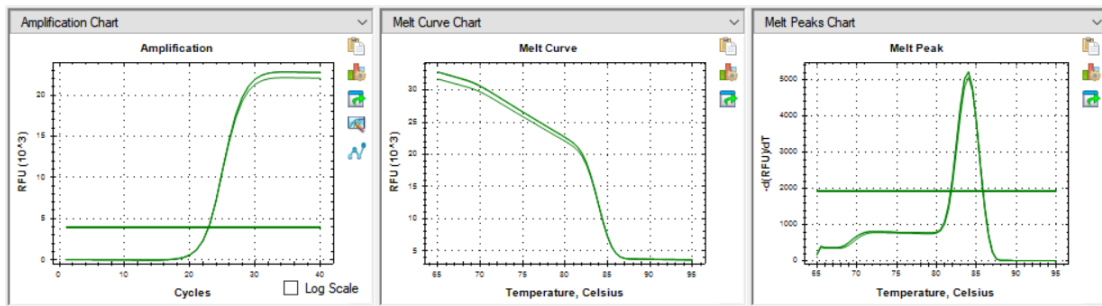

*AtActin2*

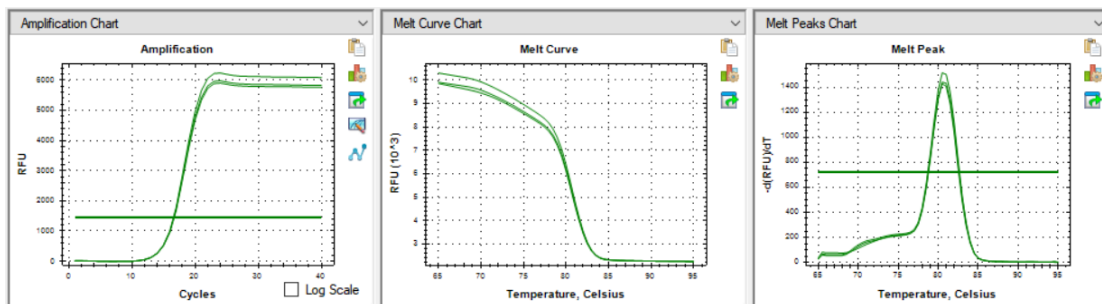

Supplement: ijms-21-04027-s001.pdf [file ijms-21-04027-s001.pdf]
